# Supplementary material
Source: PubMed Central journal article supplement (PMC3980576)
Supplement: NIHMS566379-supplement-1.pdf [file NIHMS566379-supplement-1.pdf]

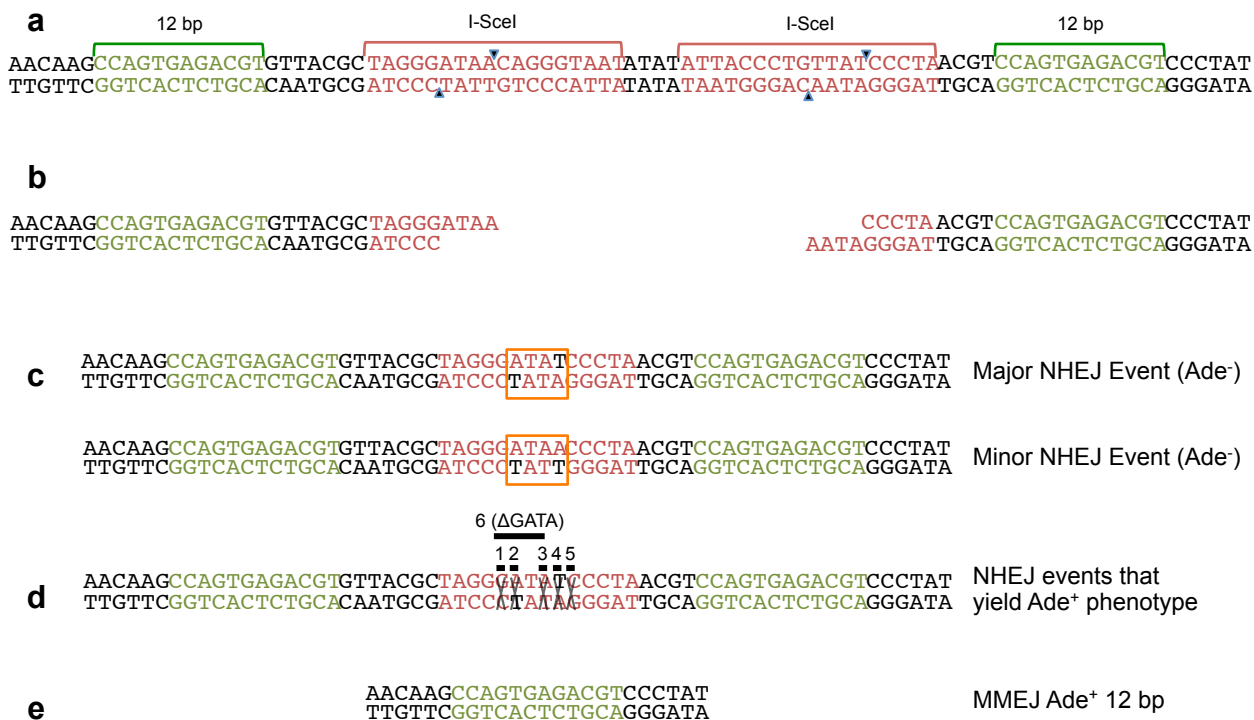

**Figure S1. I-SceI cut site and repair sequences.**

**a**, Sequence of Inverted I-SceI site and 12 bp microhomology **b**, I-SceI cut site with resulting overhangs **c**, Main classes of NHEJ events **d**, NHEJ events that yield an Ade<sup>+</sup> phenotype. Deletion of any one of the five indicated nucleotides or GATA (4 consecutive nucleotides) restores the *ADE2* reading frame to yield Ade<sup>+</sup> NHEJ events **e**, MMEJ using 12 bp microhomology

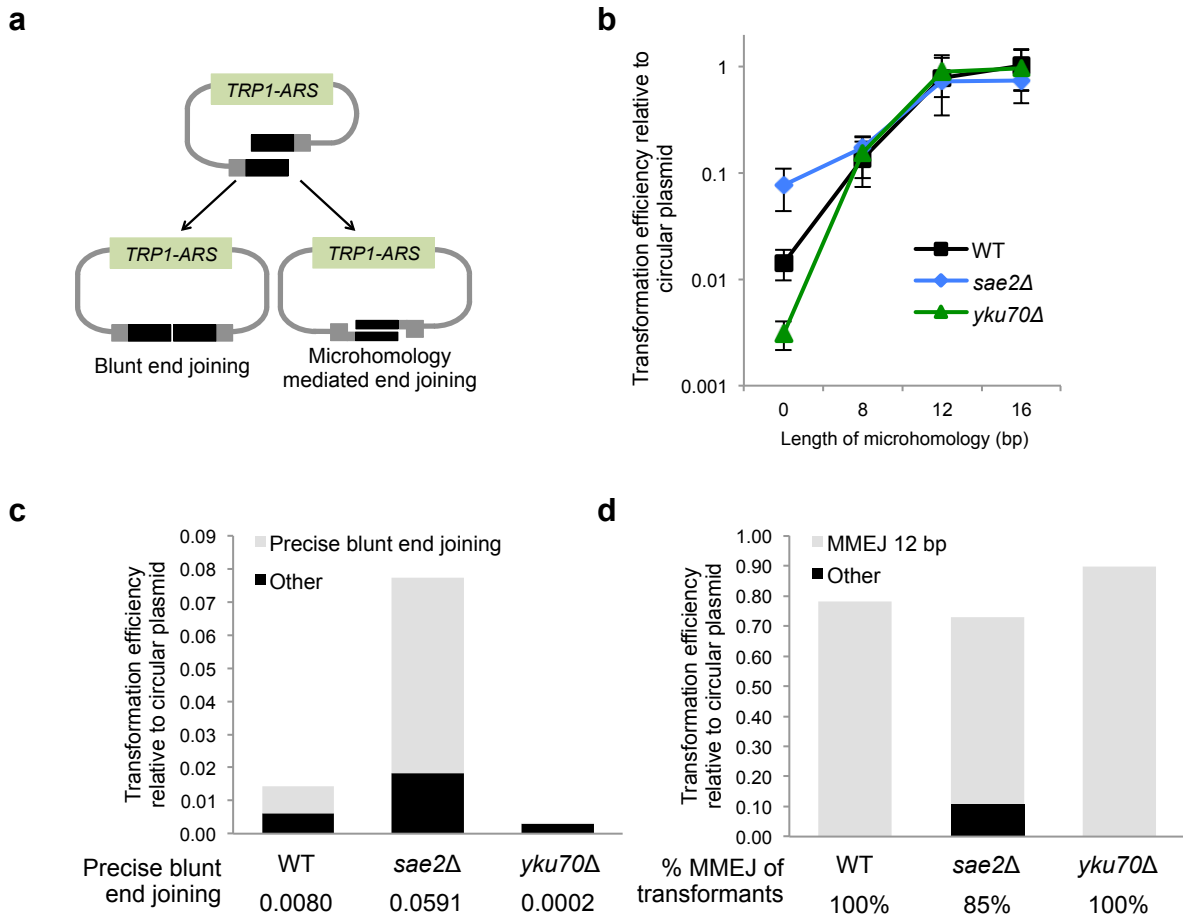

**Figure S2. MMEJ is Ku-independent and partially Sae2 dependent.**

**a**, Linear substrate for blunt end joining (0 MH) or with a direct repeat (8-16 bp) to promote repair by MMEJ. **b**, Graph of end joining frequencies of the indicated strains; transformations were performed in triplicate and error bars show s.d. **c**, Graph showing the fraction of precise blunt end joining as determined by sequencing at least 16 independently derived Trp<sup>+</sup> clones of the indicated genotypes. **d**, Graph showing the percent of circularization events that utilize the 12 bp MH as determined by sequencing 15-27 clones.

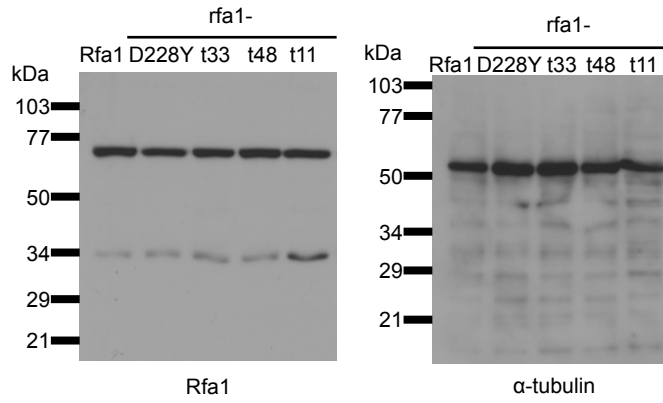

**Figure S3.**

Western blot of extracts prepared from the indicated strains probed with anti-Rfa1 or anti- $\alpha$ -tubulin antibodies (cropped version shown in Figure 2b).

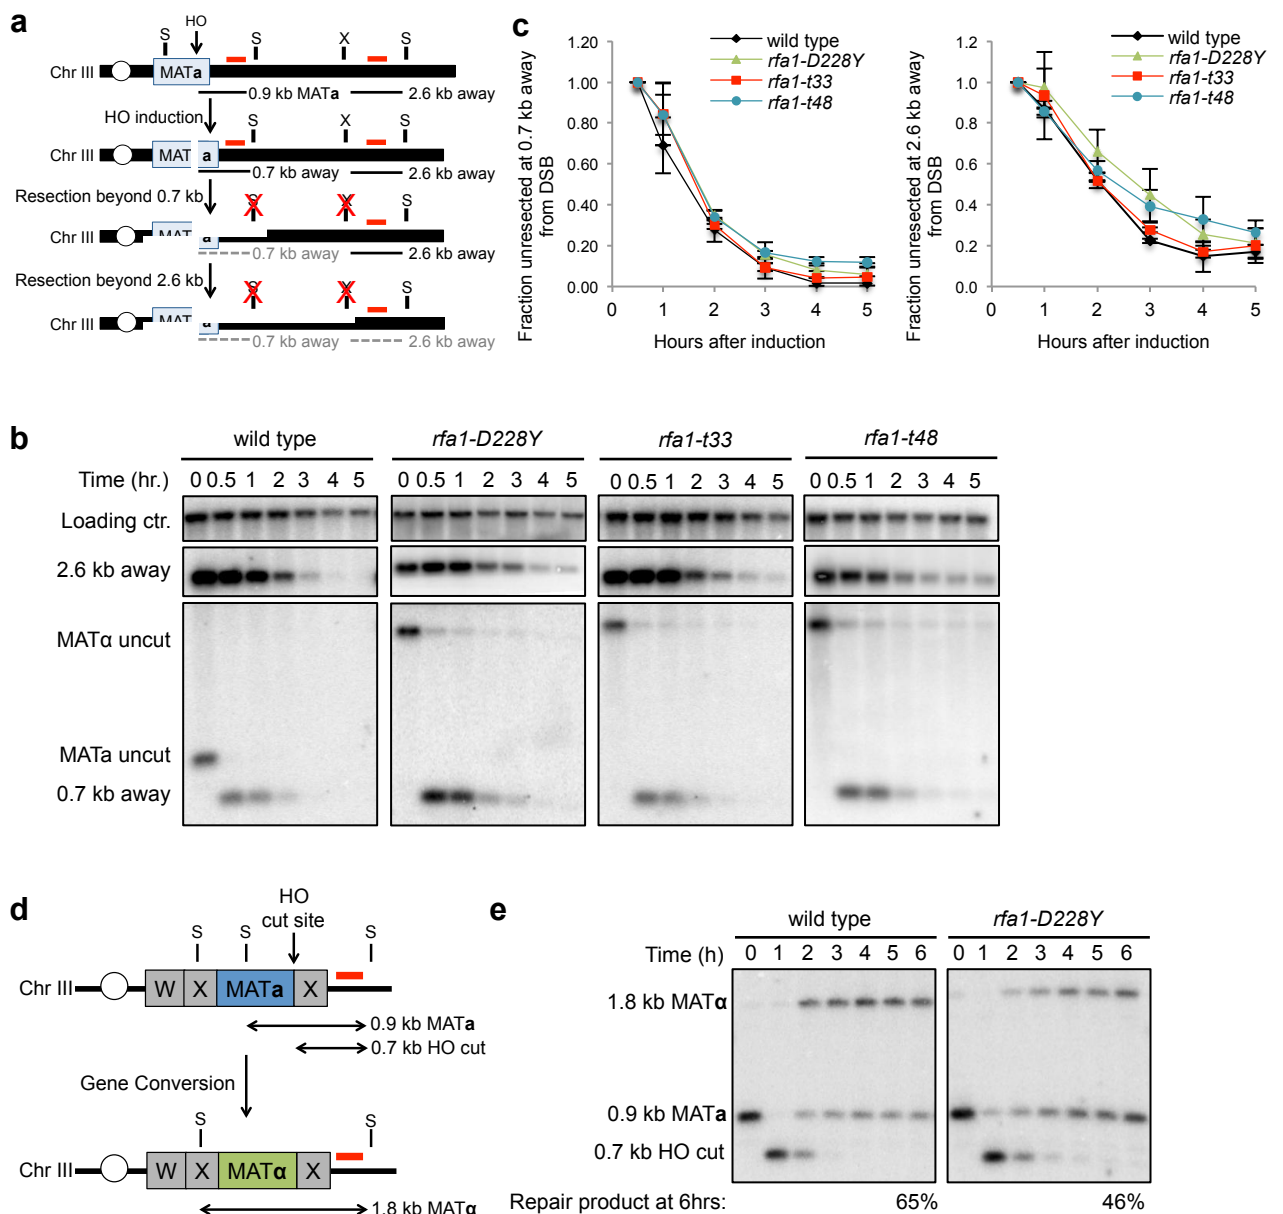

**Figure S4. End resection and strand invasion in the *rfa1* mutants.**

**a**, Schematic representation of the band disappearance resection assay. Loss of the 0.7 and 2.6 kb away fragments indicate resection has proceeded beyond the *StyI* (S) and *XbaI* (X) restriction sites rendering them single-stranded and resistant to digestion. The red lines indicate the location of probes used to detect the 0.7kb and 2.6 kb distal restriction fragments. **b**, Southern blot of *StyI* and *XbaI* digested genomic DNA isolated from wild type, *rfa1-D228Y*, *rfa1-t33*, and *rfa1-t48* cells. **c**, Quantification of resection 0.7 kb and 2.6 kb away from the HO cut site. **d**, Schematic for the mating-type switching assay: the 0.9 kb *StyI* MAT $\alpha$  fragment is cleaved upon HO induction to yield a 0.7 kb cut fragment. The 0.7 kb fragment disappears as resection proceeds and the break is repaired resulting in a 1.8 kb MAT $\alpha$  fragment. **e**, Representative Southern blot of *StyI*-digested genomic DNA from wild type and *rfa1-D228Y* cells at different times after HO induction.

**Table S1A. Major microhomologies used**

|           | Microhomology <sup>1</sup>     | Distance from break (bp) |
|-----------|--------------------------------|--------------------------|
| 12 bp MH  | CCA GTG AGA CGT                | 12 / 9                   |
| 16 bp iMH | AGC <b>AGG</b> TCC CCA AAG TGT | 32 / 5377                |

**Table S1B. Alternative microhomologies used**

| Genotype          | no. of events | Microhomology <sup>1</sup>           | Distance from break (bp) |
|-------------------|---------------|--------------------------------------|--------------------------|
|                   | 1             | GCT ATT <b>CCT</b> TCA               | 4828 / 5539              |
| <i>yku70Δ</i>     | 1             | ATG <b>CAG</b> AA                    | 304 / 2107               |
|                   | 1             | AAA TGA GGC CTA TTG                  | 4374 / 2277              |
| <i>dnl4Δ</i>      | 2             | AAA TGA GGC CTA TTG                  | 4374 / 2277              |
| <i>rfa1-t33</i>   | 1             | ATT TTT <b>GAC</b> GCC <b>CTT</b> CT | 1383 / 5279              |
|                   | 1             | TGA TCA AGA ATG T                    | 4812 / 4067              |
| <i>rfa1-D228Y</i> | 1             | AAA TGA GGC CTA TTG                  | 4374 / 2277              |
|                   | 1             | ACA GG                               | 0 / 4194                 |
| <i>rfa1-t48</i>   | 1             | CCA <b>GGC</b> <b>CGG</b> T          | 19 / 3241                |

<sup>1</sup> Bold font indicates a mismatch

**Table S2: Yeast Strains**

| Strain      | Genotype                                                                               | Source       |
|-------------|----------------------------------------------------------------------------------------|--------------|
| LSY0678     | <i>MATa</i>                                                                            | R. Rothstein |
| LSY0679     | <i>MATα</i>                                                                            | R. Rothstein |
| LSY1099     | <i>MATa TRP1</i>                                                                       | <sup>1</sup> |
| LSY2000     | <i>MATa trp1ars416::kanMX6</i>                                                         | This study   |
| LSY2013-1D  | <i>MATa trp1ars416::kanMX6 yku70::HIS3</i>                                             | This study   |
| LSY2577-8A  | <i>MATα trp1ars416::kanMX6 sae2::kanMX6</i>                                            | This study   |
| LSY2956-8D  | <i>MATα ade2-ISIR-12MH lys2::P<sub>GAL</sub>-I-Scel</i>                                | This study   |
| LSY2957-2B  | <i>MATa ade2-ISIR-12MH lys2::P<sub>GAL</sub>-I-Scel sae2::kanMX6</i>                   | This study   |
| LSY2999-6C  | <i>MATα ade2-ISIR-12MH lys2::P<sub>GAL</sub>-I-Scel yku70::HIS3</i>                    | This study   |
| LSY3006-13B | <i>MATa ade2-ISIR-12MH lys2::P<sub>GAL</sub>-I-Scel dnl4::kanMX6</i>                   | This study   |
| LSY3013-3C  | <i>MATα ade2-ISIR-12MH lys2::P<sub>GAL</sub>-I-Scel sgs1::hphMX6</i>                   | This study   |
| LSY3013-15B | <i>MATa ade2-ISIR-12MH lys2::P<sub>GAL</sub>-I-Scel exo1::URA3</i>                     | This study   |
| LSY3013-16C | <i>MATa ade2-ISIR-12MH lys2::P<sub>GAL</sub>-I-Scel sgs1::hphMX4 exo1::URA3</i>        | This study   |
| LSY3014-1C  | <i>MATα ade2-ISIR-12MH lys2::P<sub>GAL</sub>-I-Scel rad51::LEU2</i>                    | This study   |
| LSY3014-3B  | <i>MATα ade2-ISIR-12MH lys2::P<sub>GAL</sub>-I-Scel rad52::TRP1</i>                    | This study   |
| LSY3014-17C | <i>MATα ade2-ISIR-12MH lys2::P<sub>GAL</sub>-I-Scel rad51::LEU2 rad52::TRP1</i>        | This study   |
| LSY2997-12D | <i>MATα ade2-ISIR-12MH lys2::P<sub>GAL</sub>-I-Scel rfa1-D228Y::natMX4</i>             | This study   |
| LSY2996-1A  | <i>MATα ade2-ISIR-12MH lys2::P<sub>GAL</sub>-I-Scel rfa1-t33::natMX4</i>               | This study   |
| LSY2995-6C  | <i>MATα ade2-ISIR-12MH lys2::P<sub>GAL</sub>-I-Scel rfa1-t48::natMX4</i>               | This study   |
| LSY3012-1A  | <i>MATα ade2-ISIR-12MH lys2::P<sub>GAL</sub>-I-Scel rfa1-t11</i>                       | This study   |
| LSY3006-3B  | <i>MATa ade2-ISIR-12MH lys2::P<sub>GAL</sub>-I-Scel mre11-H125N-URA3</i>               | This study   |
| LSY3011-1D  | <i>MATα ade2-ISIR-12MH lys2::P<sub>GAL</sub>-I-Scel mre11::KIURA3</i>                  | This study   |
| LSY3015-21C | <i>MATα ade2-ISIR-12MH lys2::p<sub>GAL</sub>-I-Scel rfa1-D228Y::natMX4 rad51::LEU2</i> | This study   |
| LSY3015-33D | <i>MATα ade2-ISIR-12MH lys2::p<sub>GAL</sub>-I-Scel rfa1-D228Y::natMX4 rad52::TRP1</i> | This study   |
| LSY3010-15A | <i>MATa ade2-ISIR-12MH lys2::p<sub>GAL</sub>-I-Scel rfa1-t33::natMX4 sae2::kanMX6</i>  | This study   |
| LSY2900-13A | <i>MATa ade3::P<sub>GAL</sub>-HO</i>                                                   | This study   |
| LSY2900-5D  | <i>MATa ade3::P<sub>GAL</sub>-HO rfa1-D228Y</i>                                        | This study   |
| LSY2629-9A  | <i>MATα hmlΔ hmrΔ ade3::P<sub>GAL</sub>-HO rfa1-D228Y</i>                              | This study   |
| LSY2509-2D  | <i>MATa hmlΔ hmrΔ bar1::URA3 ade3::P<sub>GAL</sub>-HO</i>                              | This study   |
| LSY2726-38A | <i>MATα hmlΔ hmrΔ ade3::P<sub>GAL</sub>-HO rfa1-t33</i>                                | This study   |
| LSY2727-7C  | <i>MATα hmlΔ hmrΔ ade3::P<sub>GAL</sub>-HO rfa1-t48</i>                                | This study   |

\*All strains are of the W303 genotype (*leu2-3, 112 trp1-1 ura3 can1 his3-11, 15 ade2-1*), only mating type and other relevant genotypes are listed.

1. Langston, L.D. & Symington, L.S. Gene targeting in yeast is initiated by two independent strand invasions. *Proc Natl Acad Sci U S A* **101**, 15392-7 (2004).
